# Supplementary material for: Synthesis and characterization of phosphorous(iii) diisocyanate and triisocyanate
Source: Royal Society of Chemistry journal article supplement (doi:10.1039/d1dt00261a), 2021-01-01
Supplement: d1dt00261a1.pdf [file d1dt00261a1.pdf]

## **Synthesis and Characterization of Phosphorous(III) Diisocyanate and Triisocyanate**

Dandan Hu,<sup>a</sup> Bo Lu,<sup>a</sup> Chao Song,<sup>a</sup> Bifeng Zhu,<sup>b</sup> Lina Wang,<sup>b</sup> Eduard Bernhardt<sup>c</sup> and Xiaoqing Zeng<sup>\*a,b</sup>

<sup>a</sup>College of Chemistry, Chemical Engineering and Materials Science, Soochow University, Suzhou, 215123, China.

<sup>b</sup>Department of Chemistry, Fudan University, Shanghai, 200433, China.  
E-mail: xqzeng@fudan.edu.cn

<sup>c</sup>FB C-Anorganische Chemie, Bergische Universität Wuppertal, Gausstrasse 20, Wuppertal, 42119, Germany.

**Computed atomic coordinates (in Angstroms) and energies (in Hartrees) for all optimized structures.**

*syn-syn*-CIP(NCO)<sub>2</sub>

B3LYP/6-311+G(3df)

|                                              |             |             |              |
|----------------------------------------------|-------------|-------------|--------------|
| N                                            | -0.03493400 | -0.71114700 | 1.26093000   |
| P                                            | 0.65608300  | 0.17483900  | 0.00000000   |
| N                                            | -0.03493400 | -0.71114700 | -1.26093000  |
| C                                            | 0.02200400  | -0.79184500 | 2.46368400   |
| C                                            | 0.02200400  | -0.79184500 | -2.46368400  |
| O                                            | 0.02200400  | -0.93318700 | -3.61609300  |
| O                                            | 0.02200400  | -0.93318700 | 3.61609300   |
| Cl                                           | -0.58637000 | 1.86862300  | 0.00000000   |
| Zero-point correction=                       |             |             | 0.029627     |
| Thermal correction to Energy=                |             |             | 0.038098     |
| Thermal correction to Enthalpy=              |             |             | 0.039042     |
| Thermal correction to Gibbs Free Energy=     |             |             | -0.006690    |
| Sum of electronic and zero-point Energies=   |             |             | -1137.938835 |
| Sum of electronic and thermal Energies=      |             |             | -1137.930364 |
| Sum of electronic and thermal Enthalpies=    |             |             | -1137.929420 |
| Sum of electronic and thermal Free Energies= |             |             | -1137.975152 |

*anti-syn*-CIP(NCO)<sub>2</sub>

B3LYP/6-311+G(3df)

|                                              |             |             |              |
|----------------------------------------------|-------------|-------------|--------------|
| P                                            | 0.04657900  | 0.46003800  | 0.89155900   |
| N                                            | -1.45294900 | -0.28444100 | 0.70537000   |
| N                                            | 1.00719300  | -0.64310800 | 0.02002200   |
| Cl                                           | -0.11895900 | 1.99484300  | -0.53543800  |
| C                                            | -2.09698500 | -0.98138500 | -0.04348100  |
| O                                            | -2.77871900 | -1.65501500 | -0.69450600  |
| O                                            | 3.27513700  | -1.22012800 | -0.33818800  |
| C                                            | 2.17574900  | -0.90510100 | -0.13770800  |
| Zero-point correction=                       |             |             | 0.029440     |
| Thermal correction to Energy=                |             |             | 0.038028     |
| Thermal correction to Enthalpy=              |             |             | 0.038972     |
| Thermal correction to Gibbs Free Energy=     |             |             | -0.008503    |
| Sum of electronic and zero-point Energies=   |             |             | -1137.936975 |
| Sum of electronic and thermal Energies=      |             |             | -1137.928387 |
| Sum of electronic and thermal Enthalpies=    |             |             | -1137.927443 |
| Sum of electronic and thermal Free Energies= |             |             | -1137.974918 |

*syn-syn-syn*-P(NCO)<sub>3</sub>

B3LYP/6-311+G(3df)

|   |             |            |             |
|---|-------------|------------|-------------|
| N | -0.00070700 | 1.48111200 | -0.33271300 |
| P | 0.00000000  | 0.00000000 | 0.49825700  |

|                                              |             |             |             |
|----------------------------------------------|-------------|-------------|-------------|
| N                                            | -1.28232700 | -0.74116800 | -0.33271300 |
| N                                            | 1.28303400  | -0.73994400 | -0.33271300 |
| C                                            | 2.30622700  | -1.33113500 | -0.09507800 |
| C                                            | -0.00031600 | 2.66281800  | -0.09507800 |
| C                                            | -2.30591000 | -1.33168300 | -0.09507800 |
| O                                            | 0.00000000  | 3.81598800  | 0.05102100  |
| O                                            | 3.30474300  | -1.90799400 | 0.05102100  |
| O                                            | -3.30474300 | -1.90799400 | 0.05102100  |
| Zero-point correction=                       |             |             | 0.042050    |
| Thermal correction to Energy=                |             |             | 0.052187    |
| Thermal correction to Enthalpy=              |             |             | 0.053131    |
| Thermal correction to Gibbs Free Energy=     |             |             | 0.002884    |
| Sum of electronic and zero-point Energies=   |             |             | -845.835939 |
| Sum of electronic and thermal Energies=      |             |             | -845.825802 |
| Sum of electronic and thermal Enthalpies=    |             |             | -845.824857 |
| Sum of electronic and thermal Free Energies= |             |             | -845.875105 |

*anti-syn-syn*-P(NCO)<sub>3</sub>

B3LYP/6-311+G(3df)

|                                              |             |             |             |
|----------------------------------------------|-------------|-------------|-------------|
| N                                            | -0.00054600 | 1.45715700  | 0.76136100  |
| P                                            | 0.00027500  | -0.23819500 | 0.81647300  |
| N                                            | -1.28102900 | -0.56151100 | -0.26469100 |
| N                                            | 1.28182700  | -0.56027300 | -0.26476600 |
| C                                            | 2.35155500  | -1.11832200 | -0.25257400 |
| C                                            | -0.00101400 | 2.37927700  | -0.02030600 |
| C                                            | -2.35021700 | -1.12059300 | -0.25243700 |
| O                                            | 3.39010900  | -1.63563900 | -0.32247100 |
| O                                            | -3.38827400 | -1.63891300 | -0.32227300 |
| O                                            | -0.00281200 | 3.32244400  | -0.69507100 |
| Zero-point correction=                       |             |             | 0.041908    |
| Thermal correction to Energy=                |             |             | 0.052104    |
| Thermal correction to Enthalpy=              |             |             | 0.053049    |
| Thermal correction to Gibbs Free Energy=     |             |             | 0.000144    |
| Sum of electronic and zero-point Energies=   |             |             | -845.833995 |
| Sum of electronic and thermal Energies=      |             |             | -845.823799 |
| Sum of electronic and thermal Enthalpies=    |             |             | -845.822855 |
| Sum of electronic and thermal Free Energies= |             |             | -845.875759 |

*syn-syn*-CIP(NCO)<sub>2</sub>

BP86/6-311+G(3df)

|   |             |             |             |
|---|-------------|-------------|-------------|
| N | -0.19034300 | -0.70809100 | 1.26395600  |
| P | 0.66323000  | 0.04826000  | 0.00000000  |
| N | -0.19034300 | -0.70809100 | -1.26395600 |
| C | -0.10951000 | -0.78052400 | 2.47849000  |

|                                              |             |             |              |
|----------------------------------------------|-------------|-------------|--------------|
| C                                            | -0.10951000 | -0.78052400 | -2.47849000  |
| O                                            | -0.10951000 | -0.91143600 | -3.64412600  |
| O                                            | -0.10951000 | -0.91143600 | 3.64412600   |
| Cl                                           | -0.24808000 | 1.94933200  | 0.00000000   |
| Zero-point correction=                       |             |             | 0.028567     |
| Thermal correction to Energy=                |             |             | 0.037180     |
| Thermal correction to Enthalpy=              |             |             | 0.038124     |
| Thermal correction to Gibbs Free Energy=     |             | -0.007803   |              |
| Sum of electronic and zero-point Energies=   |             |             | -1138.003664 |
| Sum of electronic and thermal Energies=      |             |             | -1137.995052 |
| Sum of electronic and thermal Enthalpies=    |             |             | -1137.994107 |
| Sum of electronic and thermal Free Energies= |             |             | -1138.040034 |

*anti-syn*-ClP(NCO)<sub>2</sub>

BP86/6-311+G(3df)

|                                              |             |             |              |
|----------------------------------------------|-------------|-------------|--------------|
| P                                            | 0.03458100  | 0.48843400  | 0.87730200   |
| N                                            | -1.51077100 | -0.18765500 | 0.67558400   |
| N                                            | 0.95407100  | -0.66481700 | -0.00166700  |
| Cl                                           | -0.05587200 | 2.04332700  | -0.54298300  |
| C                                            | -2.09226100 | -0.98334600 | -0.04591100  |
| O                                            | -2.72789700 | -1.74370500 | -0.66903400  |
| O                                            | 3.23832000  | -1.31204300 | -0.28876100  |
| C                                            | 2.13303100  | -0.95828200 | -0.11807100  |
| Zero-point correction=                       |             |             | 0.028354     |
| Thermal correction to Energy=                |             |             | 0.037095     |
| Thermal correction to Enthalpy=              |             |             | 0.038039     |
| Thermal correction to Gibbs Free Energy=     |             | -0.009470   |              |
| Sum of electronic and zero-point Energies=   |             |             | -1138.001539 |
| Sum of electronic and thermal Energies=      |             |             | -1137.992798 |
| Sum of electronic and thermal Enthalpies=    |             |             | -1137.991854 |
| Sum of electronic and thermal Free Energies= |             |             | -1138.039363 |

*syn-syn-syn*-P(NCO)<sub>3</sub>

BP86/6-311+G(3df)

|   |             |             |             |
|---|-------------|-------------|-------------|
| N | -0.00019300 | 1.48814200  | -0.36542900 |
| P | 0.00000000  | 0.00000000  | 0.47951900  |
| N | -1.28867300 | -0.74423800 | -0.36542900 |
| N | 1.28886500  | -0.74390400 | -0.36542900 |
| C | 2.31565100  | -1.33684600 | -0.08682600 |
| C | -0.00008300 | 2.67383500  | -0.08682600 |
| C | -2.31556800 | -1.33699000 | -0.08682600 |
| O | 0.00000000  | 3.83550600  | 0.08517000  |
| O | 3.32164600  | -1.91775300 | 0.08517000  |
| O | -3.32164600 | -1.91775300 | 0.08517000  |

|                                              |             |
|----------------------------------------------|-------------|
| Zero-point correction=                       | 0.040521    |
| Thermal correction to Energy=                | 0.050840    |
| Thermal correction to Enthalpy=              | 0.051784    |
| Thermal correction to Gibbs Free Energy=     | 0.001252    |
| Sum of electronic and zero-point Energies=   | -845.876977 |
| Sum of electronic and thermal Energies=      | -845.866658 |
| Sum of electronic and thermal Enthalpies=    | -845.865714 |
| Sum of electronic and thermal Free Energies= | -845.916245 |

*anti-syn-syn*-P(NCO)<sub>3</sub>

BP86/6-311+G(3df)

|                                              |             |             |             |
|----------------------------------------------|-------------|-------------|-------------|
| N                                            | 0.00002100  | 1.43390300  | 0.80596000  |
| P                                            | -0.00002400 | -0.27788300 | 0.80585500  |
| N                                            | -1.28384700 | -0.57041400 | -0.30035600 |
| N                                            | 1.28379200  | -0.57048500 | -0.30034600 |
| C                                            | 2.38346800  | -1.09483400 | -0.25538400 |
| C                                            | 0.00011200  | 2.35125300  | -0.00141000 |
| C                                            | -2.38356400 | -1.09467400 | -0.25539600 |
| O                                            | 3.45262900  | -1.57756500 | -0.30773000 |
| O                                            | -3.45276400 | -1.57732200 | -0.30774500 |
| O                                            | 0.00019700  | 3.29823200  | -0.69096000 |
| Zero-point correction=                       |             |             | 0.040377    |
| Thermal correction to Energy=                |             |             | 0.050749    |
| Thermal correction to Enthalpy=              |             |             | 0.051694    |
| Thermal correction to Gibbs Free Energy=     |             |             | -0.000589   |
| Sum of electronic and zero-point Energies=   |             |             | -845.874899 |
| Sum of electronic and thermal Energies=      |             |             | -845.864527 |
| Sum of electronic and thermal Enthalpies=    |             |             | -845.863582 |
| Sum of electronic and thermal Free Energies= |             |             | -845.915865 |

*syn-syn*-ClP(NCO)<sub>2</sub>

mPW1PW9/6-311+G(3df)

|                                          |             |             |             |
|------------------------------------------|-------------|-------------|-------------|
| N                                        | -0.19034300 | -0.70809100 | 1.26395600  |
| P                                        | 0.66323000  | 0.04826000  | 0.00000000  |
| N                                        | -0.19034300 | -0.70809100 | -1.26395600 |
| C                                        | -0.10951000 | -0.78052400 | 2.47849000  |
| C                                        | -0.10951000 | -0.78052400 | -2.47849000 |
| O                                        | -0.10951000 | -0.91143600 | -3.64412600 |
| O                                        | -0.10951000 | -0.91143600 | 3.64412600  |
| Cl                                       | -0.24808000 | 1.94933200  | 0.00000000  |
| Zero-point correction=                   |             |             | 0.030214    |
| Thermal correction to Energy=            |             |             | 0.038594    |
| Thermal correction to Enthalpy=          |             |             | 0.039538    |
| Thermal correction to Gibbs Free Energy= |             |             | -0.006054   |

|                                              |              |
|----------------------------------------------|--------------|
| Sum of electronic and zero-point Energies=   | -1137.846647 |
| Sum of electronic and thermal Energies=      | -1137.838267 |
| Sum of electronic and thermal Enthalpies=    | -1137.837323 |
| Sum of electronic and thermal Free Energies= | -1137.882914 |

*anti-syn*-ClP(NCO)<sub>2</sub>

mPW1PW9/6-311+G(3df)

|                                              |             |             |              |
|----------------------------------------------|-------------|-------------|--------------|
| P                                            | 0.03835600  | 0.48426100  | 0.86966200   |
| N                                            | -1.46823300 | -0.23379600 | 0.69119100   |
| N                                            | 0.97494800  | -0.62453300 | -0.00494200  |
| Cl                                           | -0.11649400 | 1.99743800  | -0.53880300  |
| C                                            | -2.05794700 | -0.99581500 | -0.03643200  |
| O                                            | -2.68916200 | -1.72686500 | -0.66871100  |
| O                                            | 3.23451200  | -1.24528700 | -0.29546500  |
| C                                            | 2.14048600  | -0.90999200 | -0.12617200  |
| Zero-point correction=                       |             |             | 0.030019     |
| Thermal correction to Energy=                |             |             | 0.038516     |
| Thermal correction to Enthalpy=              |             |             | 0.039460     |
| Thermal correction to Gibbs Free Energy=     |             |             | -0.007842    |
| Sum of electronic and zero-point Energies=   |             |             | -1137.844675 |
| Sum of electronic and thermal Energies=      |             |             | -1137.836178 |
| Sum of electronic and thermal Enthalpies=    |             |             | -1137.835234 |
| Sum of electronic and thermal Free Energies= |             |             | -1137.882536 |

*syn-syn-syn*-P(NCO)<sub>3</sub>

mPW1PW9/6-311+G(3df)

|                                            |             |             |             |
|--------------------------------------------|-------------|-------------|-------------|
| N                                          | -0.00019300 | 1.48814200  | -0.36542900 |
| P                                          | 0.00000000  | 0.00000000  | 0.47951900  |
| N                                          | -1.28867300 | -0.74423800 | -0.36542900 |
| N                                          | 1.28886500  | -0.74390400 | -0.36542900 |
| C                                          | 2.31565100  | -1.33684600 | -0.08682600 |
| C                                          | -0.00008300 | 2.67383500  | -0.08682600 |
| C                                          | -2.31556800 | -1.33699000 | -0.08682600 |
| O                                          | 0.00000000  | 3.83550600  | 0.08517000  |
| O                                          | 3.32164600  | -1.91775300 | 0.08517000  |
| O                                          | -3.32164600 | -1.91775300 | 0.08517000  |
| Zero-point correction=                     |             |             | 0.042825    |
| Thermal correction to Energy=              |             |             | 0.052864    |
| Thermal correction to Enthalpy=            |             |             | 0.053808    |
| Thermal correction to Gibbs Free Energy=   |             |             | 0.003870    |
| Sum of electronic and zero-point Energies= |             |             | -845.690343 |
| Sum of electronic and thermal Energies=    |             |             | -845.680304 |
| Sum of electronic and thermal Enthalpies=  |             |             | -845.679360 |

Sum of electronic and thermal Free Energies= -845.729298

*anti-syn-syn*-P(NCO)<sub>3</sub>

mPW1PW9/6-311+G(3df)

|                                              |             |             |             |
|----------------------------------------------|-------------|-------------|-------------|
| N                                            | 0.00017800  | 1.43959100  | 0.78229600  |
| P                                            | -0.00013400 | -0.24908500 | 0.80583000  |
| N                                            | -1.27387300 | -0.54978100 | -0.27541100 |
| N                                            | 1.27353300  | -0.55027300 | -0.27536500 |
| C                                            | 2.34423100  | -1.10225600 | -0.25320100 |
| C                                            | 0.00068800  | 2.34954500  | -0.01165600 |
| C                                            | -2.34483500 | -1.10125100 | -0.25326400 |
| O                                            | 3.38280700  | -1.61052600 | -0.31424900 |
| O                                            | -3.38365000 | -1.60903100 | -0.31433100 |
| O                                            | 0.00117300  | 3.27996700  | -0.69634000 |
| Zero-point correction=                       |             |             | 0.042672    |
| Thermal correction to Energy=                |             |             | 0.052781    |
| Thermal correction to Enthalpy=              |             |             | 0.053725    |
| Thermal correction to Gibbs Free Energy=     |             |             | 0.000846    |
| Sum of electronic and zero-point Energies=   |             |             | -845.688306 |
| Sum of electronic and thermal Energies=      |             |             | -845.678198 |
| Sum of electronic and thermal Enthalpies=    |             |             | -845.677253 |
| Sum of electronic and thermal Free Energies= |             |             | -845.730132 |

*syn-syn*-CIP(NCO)<sub>2</sub>

CCSD(T)-F12A/aug-cc-pVTZ energy= -1136.552634427431

*anti-syn*-CIP(NCO)<sub>2</sub>

CCSD(T)-F12A/aug-cc-pVTZ energy= -1136.551532517824

*syn-syn-syn*-P(NCO)<sub>3</sub>

CCSD(T)-F12A/aug-cc-pVTZ energy= -844.691387709193

*anti-syn-syn*-P(NCO)<sub>3</sub>

CCSD(T)-F12A/aug-cc-pVTZ energy= -844.690187484567
